# Supplementary material for: An effective strategy to boost the robustness of metal–organic frameworks via introduction of size-matching ligand braces
Source: Royal Society of Chemistry journal article supplement (doi:10.1039/c5cc09432a), 2015-12-10
Supplement: c5cc09432a1.pdf [file c5cc09432a1.pdf]

**Supplementary Material (ESI) for Chemical Communications**  
**This journal is © The Royal Society of Chemistry**

---

# **An Effective Strategy to Boost the Robustness of Metal-Organic Framework via Introducing Size-Matching Ligand Braces**

Xiuli Wang,<sup>a,b,\*§</sup> Wen-Yang Gao,<sup>b, §</sup> Jian Luan,<sup>a</sup> Lukasz Wojtas<sup>b</sup> and Shengqian Ma<sup>b\*</sup>

<sup>a</sup> *Department of Chemistry, Bohai University, Jinzhou, 121000, P.R. China;* <sup>b</sup> *Department of Chemistry, University of South Florida, 4202 E. Fowler Avenue, Tampa, Florida 33620, USA*

§ Equal contribution

## **ELECTRONIC SUPPLEMENTARY INFORMATION**

### **General methods**

Commercially available reagents were purchased as high purity from Fisher Scientific and used without further purification. 9,10-anthracenedicarboxylic acid (H<sub>2</sub>adc) was synthesized using the similar procedures as reported.<sup>1</sup> Thermogravimetric analysis (TGA) was performed under nitrogen on a TA Instrument Q50 from 25°C to 800 °C at the speed of 10 °C/min. FT-IR data were recorded on a PerkinElmer Spectrum Two instrument in a range from 4000 to 500 cm<sup>-1</sup> and a resolution of 4 cm<sup>-1</sup>. Powder X-ray diffraction patterns were collected on a Bruker D8 Advance X-ray diffractometer (CuK $\alpha$  = 1.54178 Å), at 40 kV, 40 mA with a scan speed of 0.5 s/step and a step size of 0.02 in 2 $\theta$  at room temperature. Gas adsorption isotherms were collected using a Micromeritics surface area analyzer ASAP-2020. Before the measurements, the freshly prepared samples of complex **1** and **2** were exchanged with HPLC-grade methanol for 3 days, and then activated with the “degas” port under the vacuum at 30 °C for 3 hours. CO<sub>2</sub> gas adsorption isotherms were collected at 195 K using an acetone-dry ice bath, 273K using a water-ice bath and at 298K with a water bath. The O<sub>2</sub>, N<sub>2</sub>, and H<sub>2</sub> adsorption isotherms were measured at 77K using a liquid nitrogen bath.

### **Single-crystal X-ray crystallography.**

The single crystal X-ray data for complex **1** and **2** were collected using Bruker-AXS

SMART-APEXII diffractometer ( $\text{CuK}\alpha = 1.54178 \text{ \AA}$ ). Indexing was performed using APEX2 (Difference Vectors method).<sup>2</sup> Data integration and reduction were performed using SaintPlus 6.01.<sup>3</sup> Absorption correction was performed by multi-scan method implemented in SADABS.<sup>4</sup> Space groups were determined using XPREP implemented in APEX2.<sup>2</sup> Structures were solved using SHELXS-97 (direct methods) and refined using SHELXL-97 (full-matrix least squares on  $F^2$ ) contained in Win GX<sup>5,6,7,8</sup> and Olex2 programs.<sup>9</sup> All non-H atoms were found in the difference Fourier map. The atoms from adc ligands, metal ions, 4,4'-bpy ligands,  $\mu_3\text{-O}$  and oxygen atoms of coordinated solvent molecules were refined anisotropically. Due to the disorder, the assignment of counterions was tentative. It has been assumed the dimethyl ammonium cation is a product of decomposition of DMA molecule and that those two share the position in the crystal structure. The geometry of disordered partially-occupied counter ions and coordinated DMA molecules were refined with restraints/constraints (DFIX, DELU, SIMU, DANG, FLAT, EXYZ, EADP, ISOR), in order to idealize the models of these ions and molecules. For complex **2** the solvent molecules were modeled as O atoms. Hydrogen atoms were placed in geometrically calculated positions and included in the refinement process using riding model with isotropic thermal parameters:  $\text{Uiso(H)} = 1.2\text{Ueq(-CH)}$ . Crystal data and refinement conditions of complex **1** and **2** are shown in Table S1 and S2, respectively.

### **Preparation of complexes 1 and 2.**

**Complex 1:** *N,N*-dimethylacetamide (DMA, 0.5 mL) solution containing  $\text{H}_2\text{adc}$  (5 mg, 0.019 mmol) was mixed thoroughly with *N,N*-dimethylacetamide (DMA, 0.25 mL) solution containing  $\text{Co}(\text{NO}_3)_2 \cdot 6\text{H}_2\text{O}$  (11 mg, 0.038 mmol), and then three drops of  $\text{HBF}_4$  were added. The mixture was sealed in a Pyrex tube, heated at 120 °C for 3 days and then cooled to room temperature. The orange block crystals were obtained with a yield of 45% based on  $\text{H}_2\text{adc}$ .

**Complex 2:** A mixture of *N,N*-dimethylacetamide (DMA, 0.5 mL) solution containing  $\text{H}_2\text{adc}$  (5 mg, 0.019 mmol) and DMA (0.25 mL) solution containing 4,4'-bpy (3 mg, 0.019 mmol) was mixed thoroughly with DMA (0.25 mL) solution containing  $\text{Co}(\text{NO}_3)_2 \cdot 6\text{H}_2\text{O}$  (11 mg, 0.038 mmol), and then four drops of  $\text{HBF}_4$  were added. The mixture was sealed in a Pyrex tube, heated at 120 °C for 4 days and then cooled to room temperature. The red block crystals were obtained

with a yield of 51% based on  $H_2adc$ .

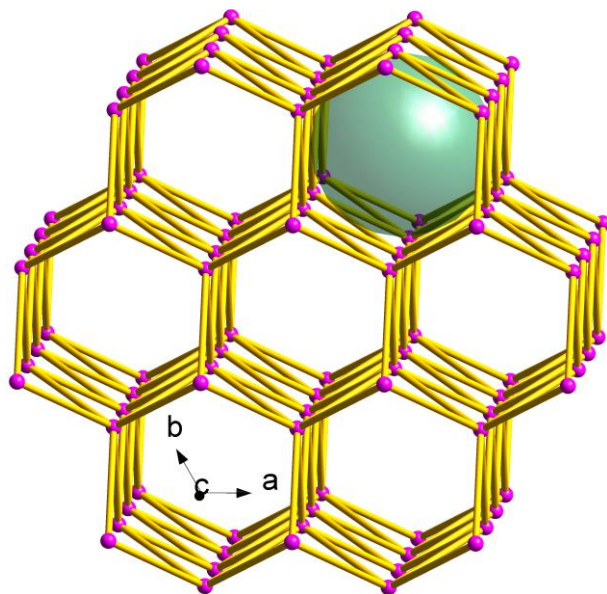

**Fig. S1** View of the topological network of complex **1**.

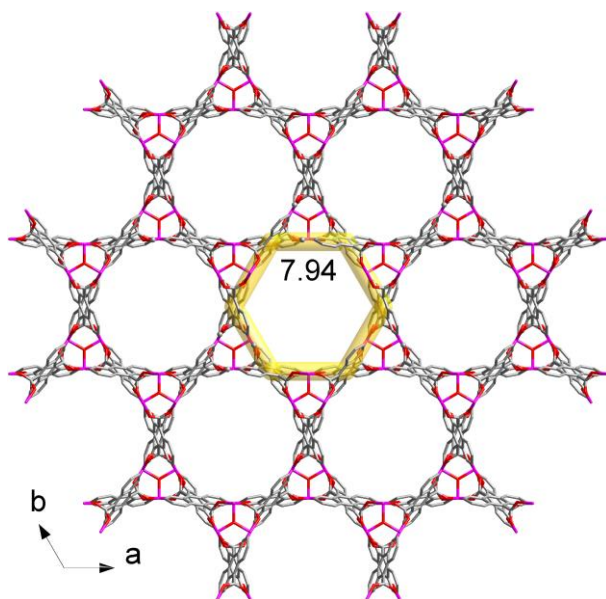

**Fig. S2** View of 3D architecture with 1D channels by remove the coordinated DMA molecules in complex **1**.

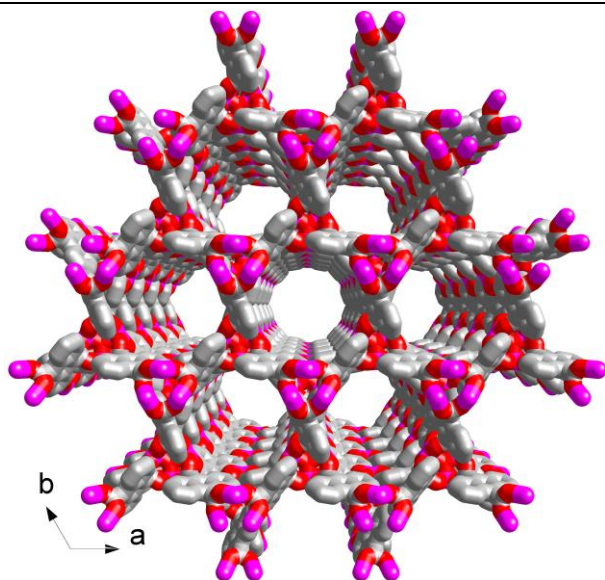

**Fig. S3** The 1D nanochannels with terminal DMA removed from tricobalt SBUs in complex **1**.

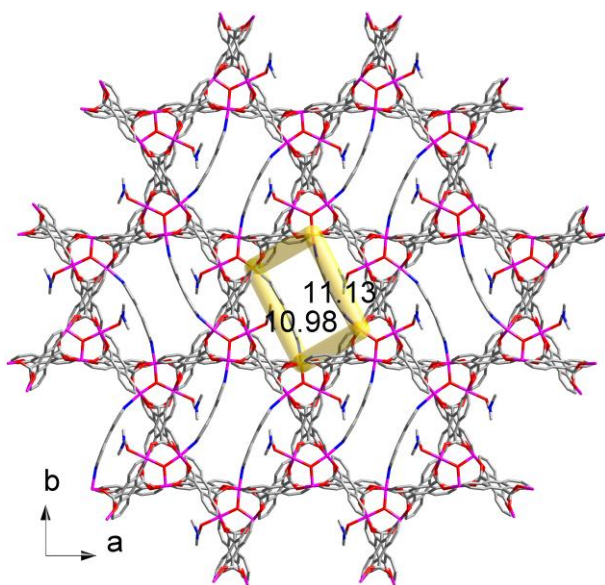

**Fig. S4** View of 3D architecture with 1D channels decorated by bpy in complex **2**.

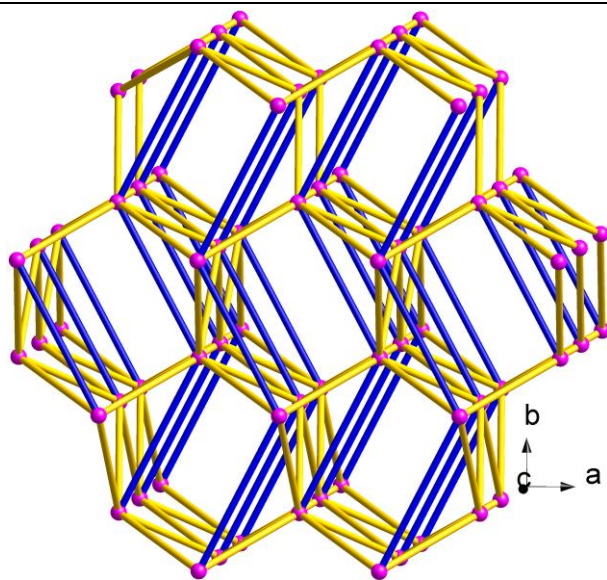

Fig. S5 View of the topological network of complex 2.

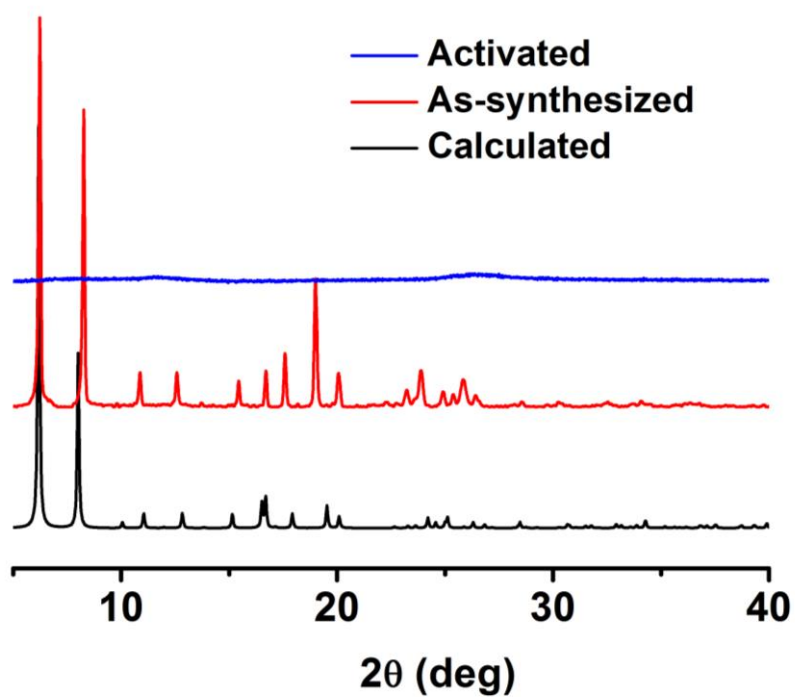

Fig. S6 The PXRD patterns of complexes 1

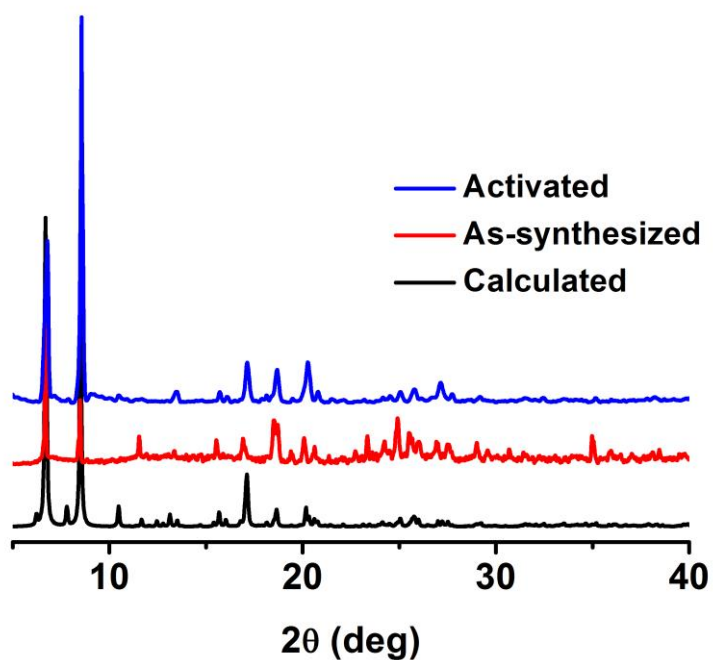

Fig. S7 The PXR D patterns for complex 2.

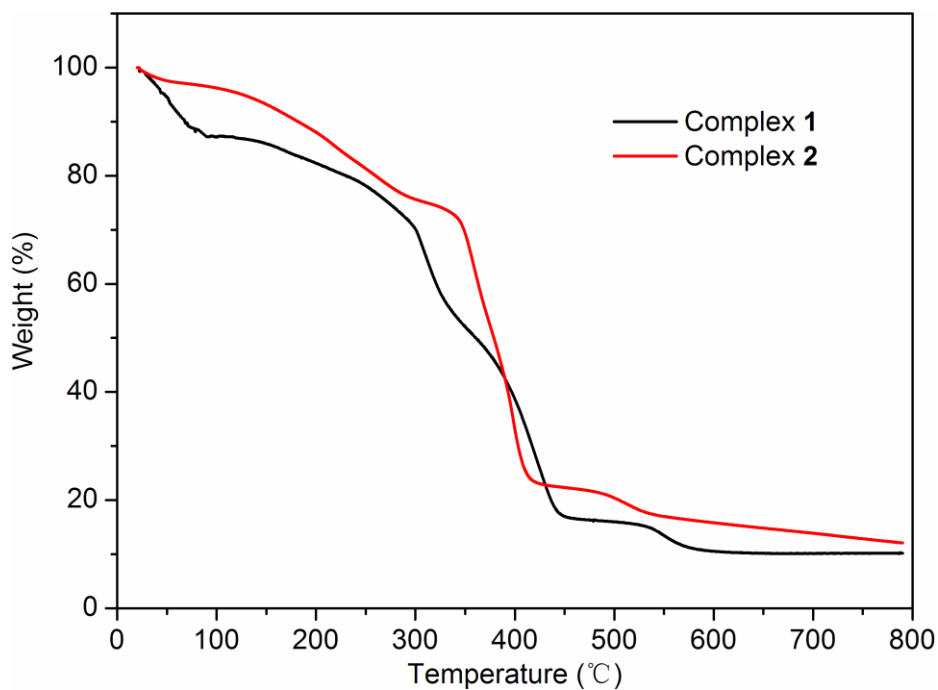

Fig. S8 The TGA curves of complexes 1 and 2.

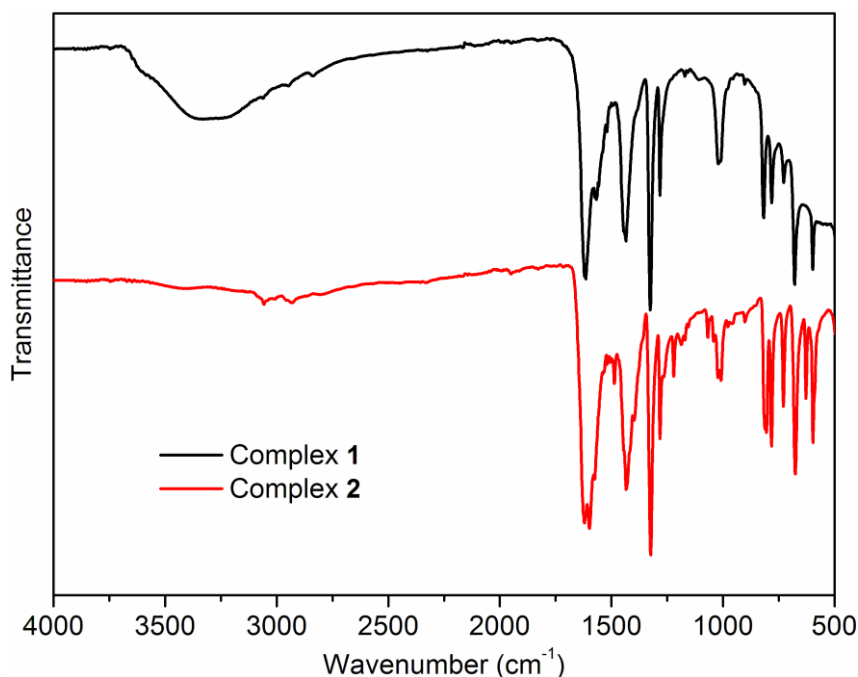

Fig. S9 The FT-IR spectra of complexes 1 and 2.

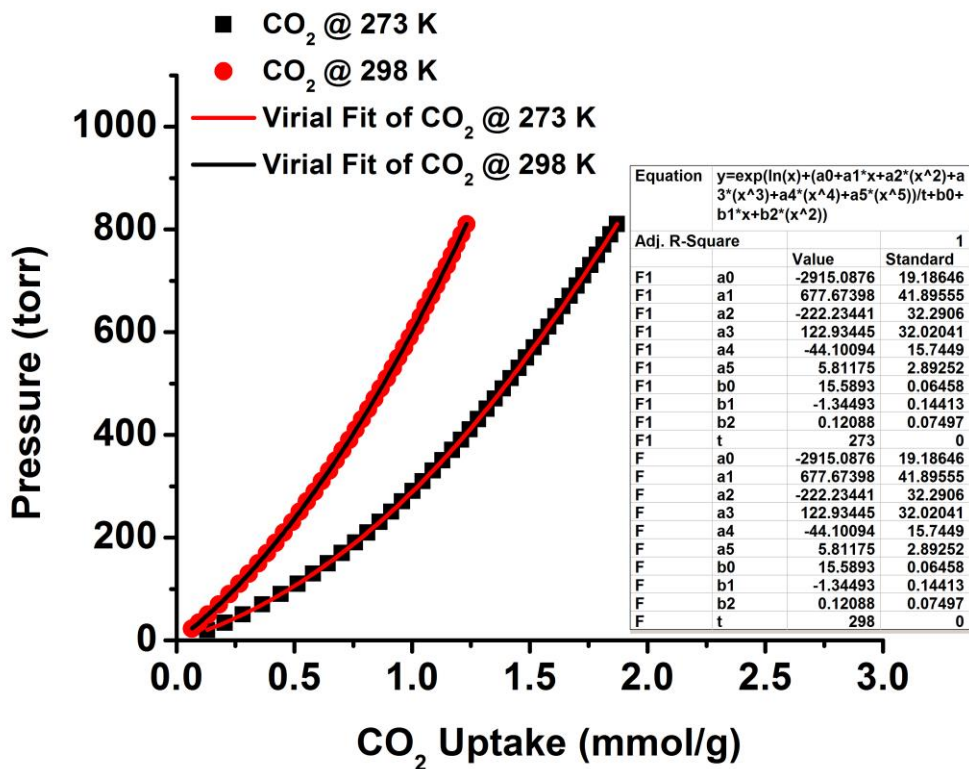

Fig. S10 The plots of virial equation of complex 2.

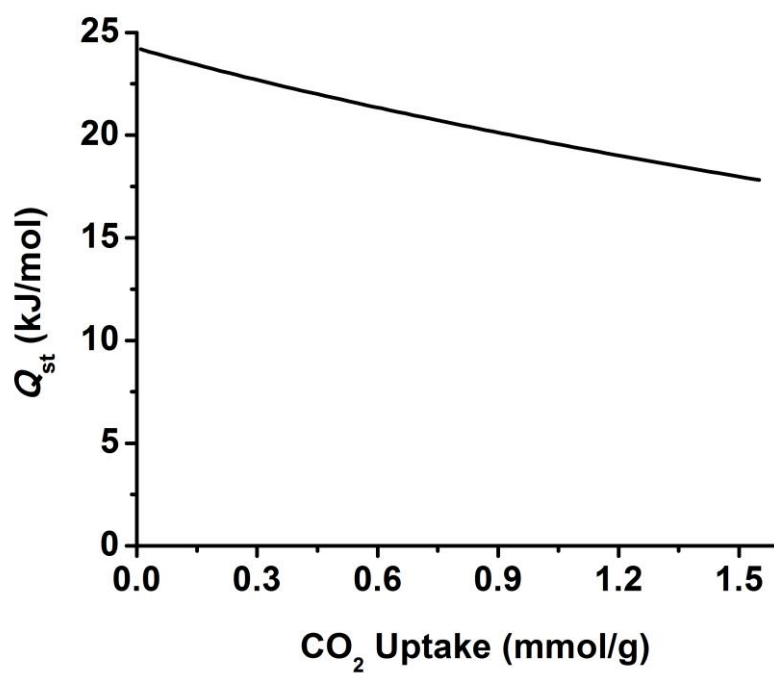

Fig. S11 Heats of adsorption of  $\text{CO}_2$  of complex 2 using the virial method.



|                                                               |                                                                                   |
|---------------------------------------------------------------|-----------------------------------------------------------------------------------|
| Identification code                                           | Complex 1                                                                         |
| Empirical formula                                             | C <sub>64</sub> H <sub>24</sub> Co <sub>3</sub> N <sub>5</sub> O <sub>18.75</sub> |
| Formula weight                                                | 1339.75                                                                           |
| Temperature/K                                                 | 233.15                                                                            |
| Crystal system                                                | trigonal                                                                          |
| Space group                                                   | <i>P</i> -3 <sub>1</sub> <i>c</i>                                                 |
| <i>a</i> /Å                                                   | 15.3816(3)                                                                        |
| <i>b</i> /Å                                                   | 15.3816(3)                                                                        |
| <i>c</i> /Å                                                   | 16.8215(4)                                                                        |
| $\alpha$ /°                                                   | 90                                                                                |
| $\beta$ /°                                                    | 90                                                                                |
| $\gamma$ /°                                                   | 120                                                                               |
| Volume/Å <sup>3</sup>                                         | 3446.66(16)                                                                       |
| Z                                                             | 2                                                                                 |
| $\rho_{\text{calc}}$ /g/cm <sup>3</sup>                       | 1.291                                                                             |
| $\mu$ /mm <sup>-1</sup>                                       | 6.182                                                                             |
| F(000)                                                        | 1348.0                                                                            |
| Crystal size/mm <sup>3</sup>                                  | 0.14 × 0.09 × 0.08                                                                |
| Radiation                                                     | CuK $\alpha$ ( $\lambda$ = 1.54178)                                               |
| 2 $\theta$ range for data collection/°                        | 6.636 to 133.01                                                                   |
| Index ranges                                                  | -17 ≤ <i>h</i> ≤ 16, -18 ≤ <i>k</i> ≤ 16, -18 ≤ <i>l</i> ≤ 16                     |
| Reflections collected                                         | 15678                                                                             |
| Independent reflections                                       | 1982 [ <i>R</i> <sub>int</sub> = 0.0693, <i>R</i> <sub>sigma</sub> = 0.0411]      |
| Data/restraints/parameters                                    | 1982/80/182                                                                       |
| Goodness-of-fit on F <sup>2</sup>                             | 1.033                                                                             |
| Final <i>R</i> indexes [ <i>I</i> >= 2 $\sigma$ ( <i>I</i> )] | <i>R</i> <sub>1</sub> = 0.0571, <i>wR</i> <sub>2</sub> = 0.1561                   |
| Final <i>R</i> indexes [all data]                             | <i>R</i> <sub>1</sub> = 0.0704, <i>wR</i> <sub>2</sub> = 0.1671                   |
| Largest diff. peak/hole / e Å <sup>-3</sup>                   | 0.70/-0.36                                                                        |

|                                                        |                                                                                  |
|--------------------------------------------------------|----------------------------------------------------------------------------------|
| Identification code                                    | Complex 2                                                                        |
| Empirical formula                                      | C <sub>69</sub> H <sub>32</sub> C <sub>3</sub> N <sub>5.75</sub> O <sub>15</sub> |
| Formula weight                                         | 1358.29                                                                          |
| Temperature/K                                          | 233.15                                                                           |
| Crystal system                                         | monoclinic                                                                       |
| Space group                                            | <i>P</i> 2 <sub>1</sub> / <i>n</i>                                               |
| <i>a</i> /Å                                            | 15.6069(4)                                                                       |
| <i>b</i> /Å                                            | 26.4325(8)                                                                       |
| <i>c</i> /Å                                            | 16.6221(5)                                                                       |
| $\alpha$ /°                                            | 90                                                                               |
| $\beta$ /°                                             | 90.155(2)                                                                        |
| $\gamma$ /°                                            | 90                                                                               |
| Volume/Å <sup>3</sup>                                  | 6857.1(3)                                                                        |
| Z                                                      | 4                                                                                |
| $\rho_{\text{calc}}$ /g/cm <sup>3</sup>                | 1.316                                                                            |
| $\mu$ /mm <sup>-1</sup>                                | 6.182                                                                            |
| F(000)                                                 | 2749.0                                                                           |
| Crystal size/mm <sup>3</sup>                           | 0.24 × 0.15 × 0.13                                                               |
| Radiation                                              | CuK $\alpha$ ( $\lambda$ = 1.54178)                                              |
| 2 $\theta$ range for data collection/°                 | 8.45 to 137.242                                                                  |
| Index ranges                                           | -18 ≤ <i>h</i> ≤ 18, -31 ≤ <i>k</i> ≤ 30, -19 ≤ <i>l</i> ≤ 19                    |
| Reflections collected                                  | 62684                                                                            |
| Independent reflections                                | 12196 [ <i>R</i> <sub>int</sub> = 0.1311, <i>R</i> <sub>sigma</sub> = 0.1057]    |
| Data/restraints/parameters                             | 12196/149/841                                                                    |
| Goodness-of-fit on F <sup>2</sup>                      | 1.020                                                                            |
| Final R indexes [ <i>I</i> >= 2 $\sigma$ ( <i>I</i> )] | <i>R</i> <sub>1</sub> = 0.0695, <i>wR</i> <sub>2</sub> = 0.1786                  |
| Final R indexes [all data]                             | <i>R</i> <sub>1</sub> = 0.1215, <i>wR</i> <sub>2</sub> = 0.2069                  |
| Largest diff. peak/hole / e Å <sup>-3</sup>            | 0.85/-0.49                                                                       |

#### Reference

1. S. Jones, J. C. C. Atherton, M. R. J. Elsegood, W. Clegg, *Acta Cryst.* 2000, **C56**, 881-883.
2. Bruker (2010). *APEX2*. Bruker AXS Inc., Madison, Wisconsin, USA.
3. Bruker (2009). *SAINT*. Data Reduction Software. Bruker AXS Inc., Madison, Wisconsin, USA.
4. G. M. Sheldrick, (2008). *SADABS*. *Program for Empirical Absorption Correction*.

University of Gottingen, Germany.

5. L. J. Farrugia, *J. Appl. Cryst.*, 1999, **32**, 837-838.
6. G. M. Sheldrick, (1997) SHELXL-97. *Program for the Refinement of Crystal*.
7. G. M. Sheldrick, *Acta Cryst.*, 1990, **A46**, 467-473.
8. G. M. Sheldrick, *Acta Cryst.*, 2008, **A64**, 112-122.
9. O. V. Dolomanov, L. J. Bourhis, R. J. Gildea, J. A. K. Howard and H. Puschmann, OLEX2: A complete structure solution, refinement and analysis program, *J. Appl. Cryst.*, 2009, **42**, 339-341.
